# Supplementary material for: Photoelectrochemical water oxidation over TiO2 nanotubes modified with MoS2 and g-C3N4
Source: publisher site journal article supplement (doi:10.3762/bjnano.13.127), 2022-12-16
Supplement: Additional file 1 [file 2190-4286-13-127-S1.pdf]

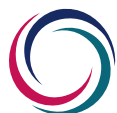

## Supporting Information

for

### Photoelectrochemical water oxidation over $\text{TiO}_2$ nanotubes modified with $\text{MoS}_2$ and $\text{g-C}_3\text{N}_4$

Phuong Hoang Nguyen, Thi Minh Cao, Tho Truong Nguyen, Hien Duy Tong and Viet Van Pham

*Beilstein J. Nanotechnol.* **2022**, *13*, 1541–1550. doi:10.3762/bjnano.13.127

## Additional figures

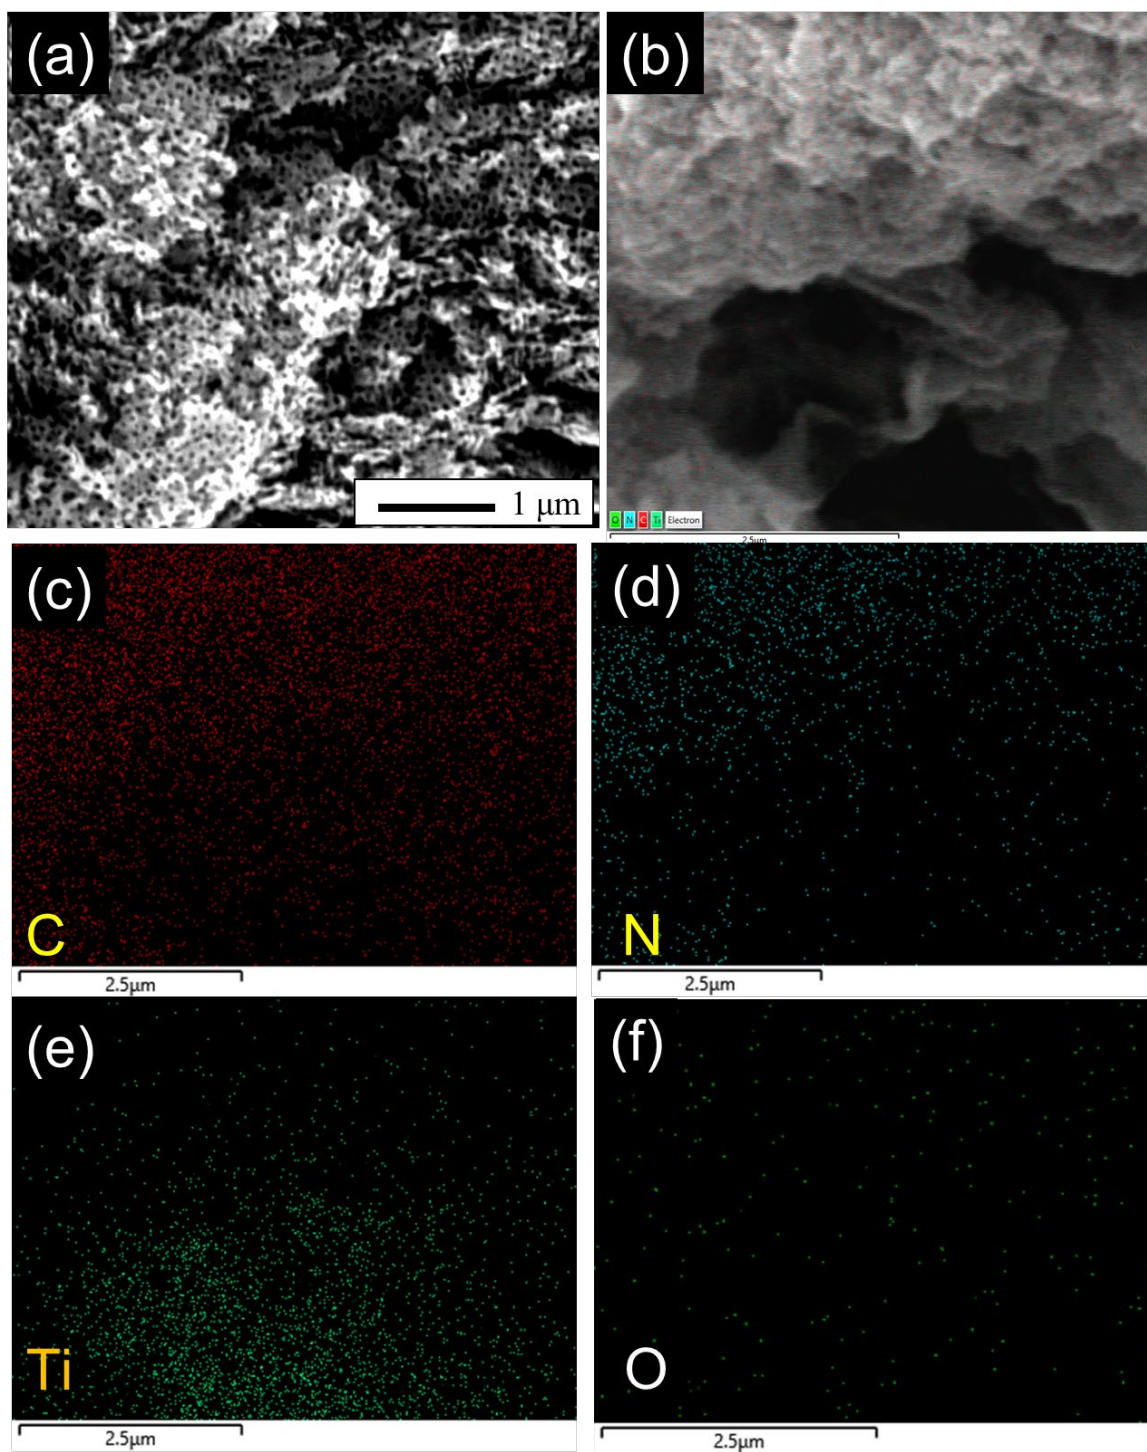

**Figure S1:** Characterization of g-C<sub>3</sub>N<sub>4</sub>/TNAs materials: (a) SEM image, (b) EDS layered image, and (c–f) element mapping.

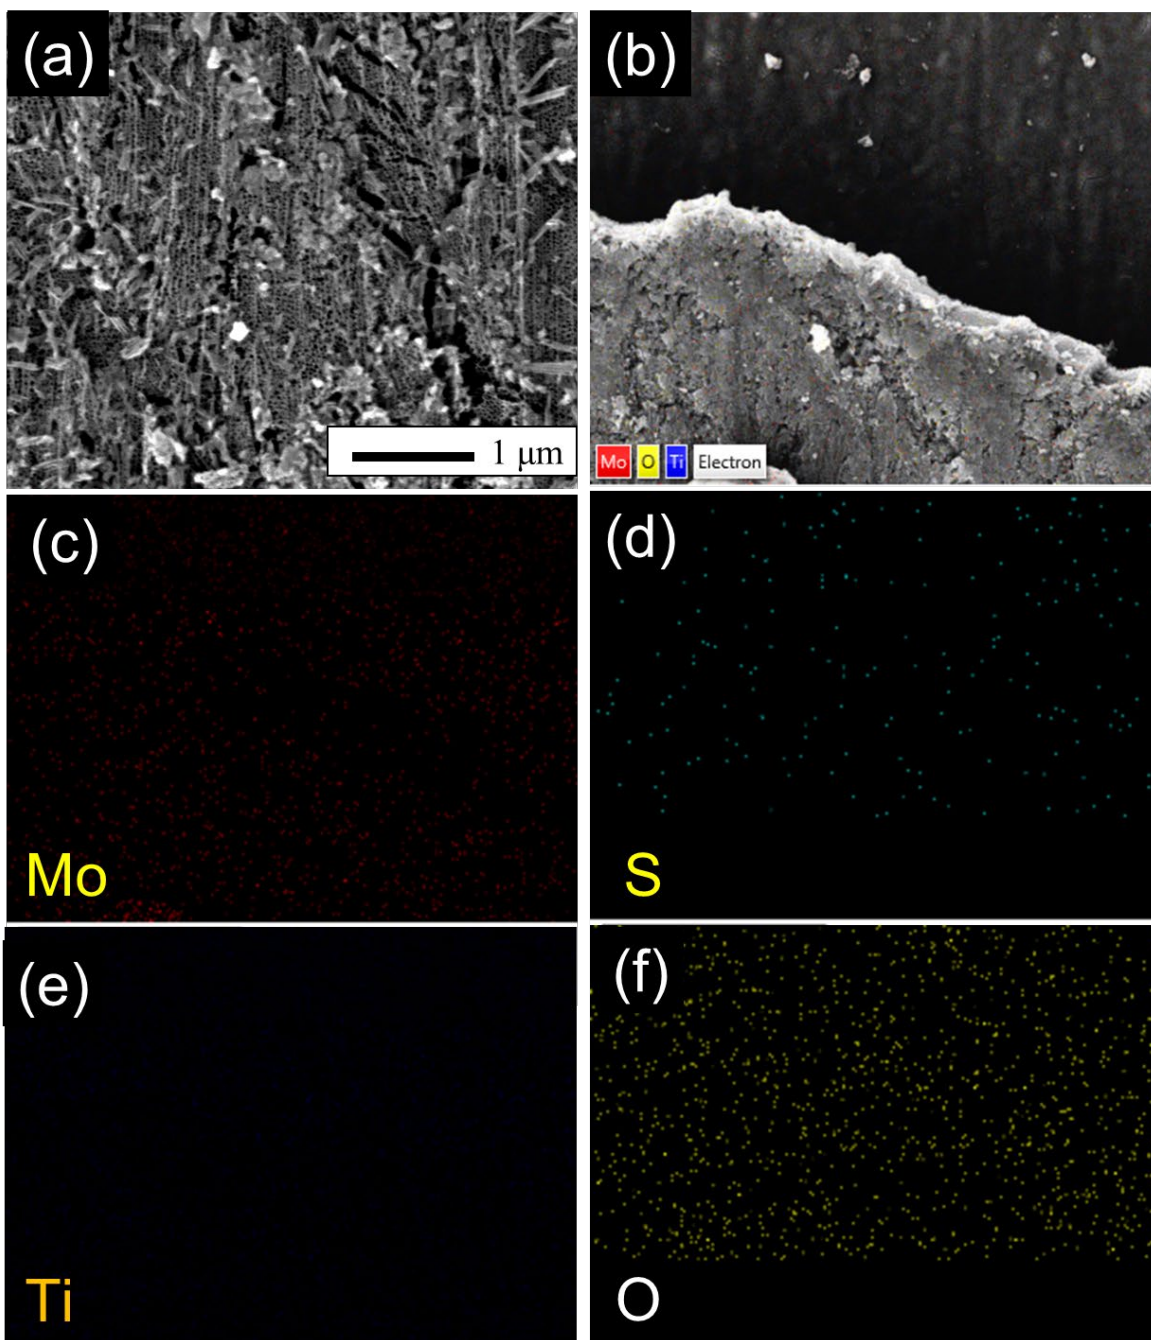

**Figure S2:** Characterization of MoS<sub>2</sub>/TNAs materials: (a) SEM image, (b) EDS layered image, (c–f) and element mapping.

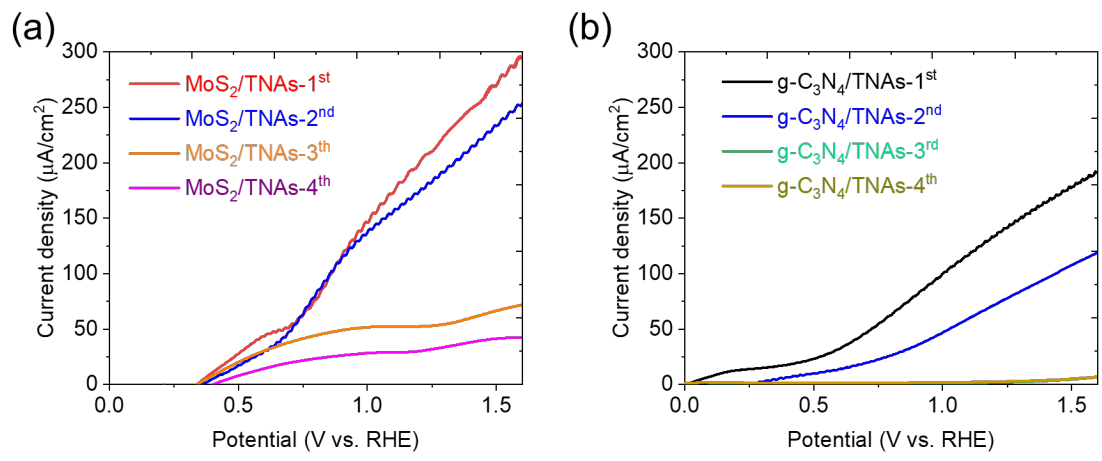

**Figure S3:** Stability of the MoS<sub>2</sub>/TNAs and g-C<sub>3</sub>N<sub>4</sub>/TNAs heterojunction. After every PEC test cycle, the PEC electrode is immersed in DI water for 1 h and after that it is dried completely before the next test.
